# Supplementary material for: In situ synchrotron X-ray diffraction studies of lithium oxygen batteries
Source: Royal Society of Chemistry journal article supplement (doi:10.1039/c3ta10361g), 2013-01-01
Supplement: c3ta10361g.pdf [file c3ta10361g.pdf]

# Li Air XRD Paper – Supplementary Information

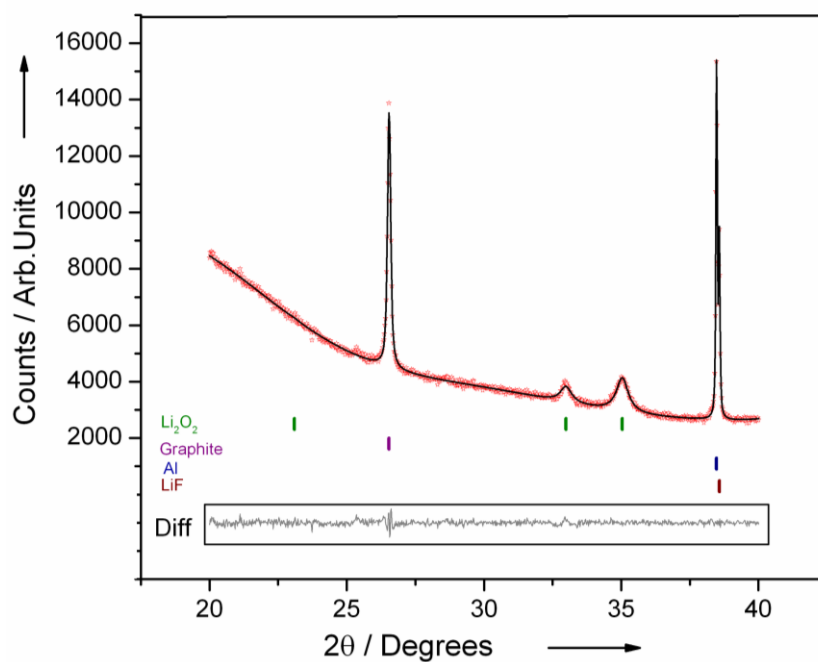

Figure S1 Final Rietveld refinement plot of the *ex situ* diffraction pattern of a plain carbon laminate after full discharge to 2.2V at a rate of 0.05mAh. The graph shows observed (red dots), calculated (black line) and difference (grey line) plots. Bragg peak positions for  $\text{Li}_2\text{O}_2$ , Graphite and Al (from current collector) and LiF (from binder) are indicated

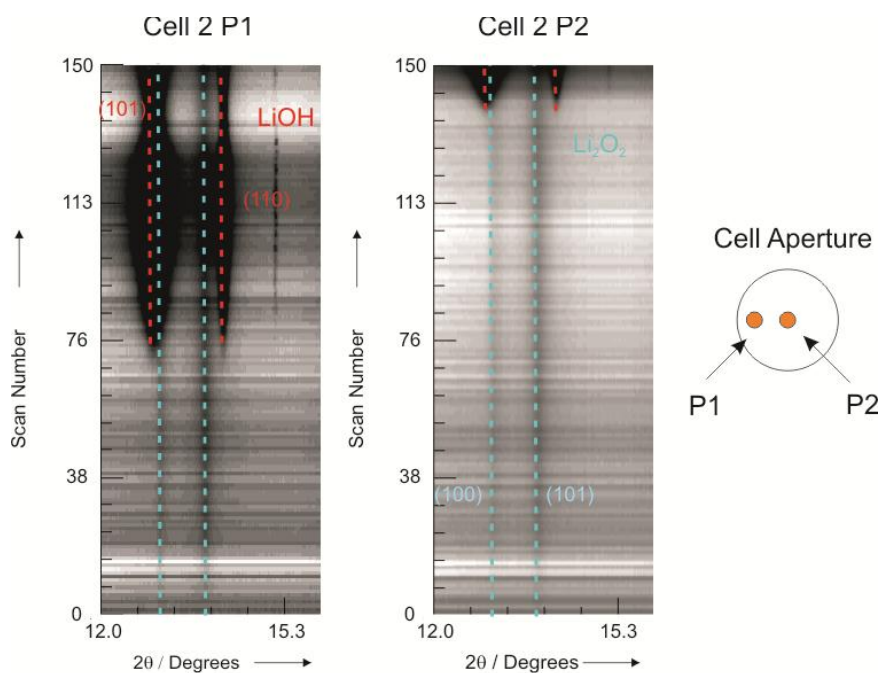

Figure S2 Surface plots from two positions across the cell 2 aperture showing the earlier onset of LiOH growth closer to the aperture edge.
